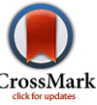

## Correction

# Correction: Influence of Miscibility Phenomenon on Crystalline Polymorph Transition in Poly(Vinylidene Fluoride)/Acrylic Rubber/Clay Nanocomposite Hybrid

## The PLOS ONE Staff

The corresponding author affiliation is incorrect. The correct affiliation for Mohammad Mahdi Abolhasani is: Chemical Engineering Department, University of Kashan, Kashan, Iran.

## Reference

1. Abolhasani MM, Naebe M, Jalali-Arani A, Guo Q (2014) Influence of Miscibility Phenomenon on Crystalline Polymorph Transition in Poly(Vinylidene Fluoride)/Acrylic Rubber/Clay Nanocomposite Hybrid. PLoS ONE 9(2): e88715. doi:10.1371/journal.pone.0088715

**Citation:** The PLOS ONE Staff (2014) Correction: Influence of Miscibility Phenomenon on Crystalline Polymorph Transition in Poly(Vinylidene Fluoride)/Acrylic Rubber/Clay Nanocomposite Hybrid. PLoS ONE 9(5): e99237. doi:10.1371/journal.pone.0099237

**Published:** May 27, 2014

**Copyright:** © 2014 The PLOS ONE Staff. This is an open-access article distributed under the terms of the Creative Commons Attribution License, which permits unrestricted use, distribution, and reproduction in any medium, provided the original author and source are credited.
